# Supplementary material
Source: ML conference proceedings conference paper supplement (https://openreview.net/forum?id=8hGabvaV2GQ)
Supplement: supplementary_material [file attachment]

---

# Watching Too Much Television is Good: Self-Supervised Audio-Visual Representation Learning from Movies and TV Shows

---

Anonymous Author(s)

Affiliation

Address

email

## 1 Implementation

Please refer to `sampling_policy.py` included in the supplemental materials.

## 2 Effect of the Sampling Policy on Training Loss

Figure 1a illustrates the self-supervised training loss ( $\mathcal{L}$ ) for different sample size ( $k$ ) values. We observe that for the baseline ( $k = 1$ ), the loss reduces faster than the cases where  $k > 1$  while according to Table 1, the generalization to the downstream tasks is worse. We expected that an increase in  $k$ , *i.e.* larger portion of negative instances are comprised of hard negatives, makes it harder for the optimization to reduce the contrastive loss, a pattern which the Figure 1a perfectly shows.

Figure 1b illustrates the effect of sampling window ( $w$ ) for a fixed sample size of  $k = 16$ . A smaller  $w$  increases the probability of instances sampled from the same long-form content to be temporally close, hence sound/look more similar to one another. That results in a harder instance-discrimination task which our objective function represents. We can see that the behavior of the self-supervised training loss very well follows the aforementioned intuition.

Figure 1c shows how drawing temporally adjacent samples from the same long-form content ( $w = k$ ) makes the self-supervised task significantly harder specially when sample size ( $k$ ) increases. We can see from Figure 1c and Table 1 that such hard constraint negatively affects the learning process and yields poor generalization to the downstream tasks.

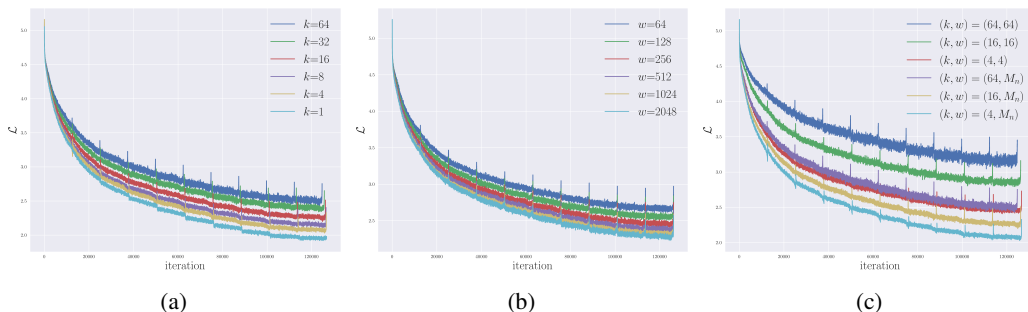

Figure 1: Effect of the proposed sampling policy on the self-supervised training loss.

Table 1: Ablation study of the proposed sampling policy on different downstream tasks, measured by top-1 classification accuracy.

| pretraining dataset: Movie |       |        |                  |        |
|----------------------------|-------|--------|------------------|--------|
| $k$                        | $w$   | HMDB51 | ESC50            | UCF101 |
| 1                          | –     | 60.32  | 86.50 $\pm$ 0.46 | 85.69  |
| 4                          | $M_n$ | 61.37  | 89.91 $\pm$ 0.06 | 85.38  |
| 8                          | $M_n$ | 62.09  | 88.75 $\pm$ 0.31 | 86.06  |
| 16                         | $M_n$ | 62.92  | 88.33 $\pm$ 0.36 | 86.30  |
| 32                         | $M_n$ | 61.04  | 88.00 $\pm$ 0.42 | 85.98  |
| 64                         | $M_n$ | 61.30  | 86.83 $\pm$ 0.17 | 85.43  |
| 16                         | 64    | 60.26  | 87.00 $\pm$ 0.20 | 83.61  |
| 16                         | 128   | 60.58  | 86.50 $\pm$ 0.31 | 85.30  |
| 16                         | 256   | 62.02  | 87.75 $\pm$ 0.23 | 84.85  |
| 16                         | 512   | 61.30  | 87.08 $\pm$ 0.13 | 85.38  |
| 16                         | 1024  | 60.65  | 86.16 $\pm$ 0.13 | 84.61  |
| 16                         | 2048  | 61.83  | 87.66 $\pm$ 0.13 | 85.11  |
| 4                          | 4     | 60.19  | 88.00 $\pm$ 0.51 | 84.66  |
| 16                         | 16    | 56.86  | 88.75 $\pm$ 0.31 | 82.71  |
| 64                         | 64    | 57.45  | 84.58 $\pm$ 0.37 | 82.68  |
| pretraining dataset: TV    |       |        |                  |        |
| $k$                        | $w$   | HMDB51 | ESC50            | UCF101 |
| 1                          | –     | 56.40  | 85.50 $\pm$ 0.54 | 84.37  |
| 8                          | $M_n$ | 61.50  | 87.50 $\pm$ 0.42 | 85.96  |
| 16                         | $M_n$ | 61.69  | 89.00 $\pm$ 0.47 | 85.64  |
| 8                          | 64    | 60.58  | 88.00 $\pm$ 0.23 | 85.96  |
| 8                          | 128   | 60.00  | 85.66 $\pm$ 0.27 | 85.77  |
| 16                         | 256   | 61.30  | 86.41 $\pm$ 0.27 | 85.01  |

### 3 Error bars for ESC50 Experiments

Table 1 is copied from the main submission except we have included the standard error over three times conducting the fine-tuning for the audio classification task. We did not observe meaningful sensitivity for the action recognition tasks.

### 4 Experimental Setup: More Details

**Pretraining.** Unless mentioned otherwise, all the models are trained for 10 epochs using ADAM [3] optimizer, with an initial learning rate of  $10^{-4}$  which linearly warms up to 0.002 during the first epoch. We use a cosine learning rate schedule and a batch size of 512. Kernel size of both convolution layers in either  $h_f$  or  $h_g$  is 1.

**Downstream Evaluation.** On UCF101[6] and HMDB51[4], we respectively train for a total of 150 and 200 epochs using SGD, with an initial learning rate of  $10^{-3}$  which linearly warms up to 0.2 during the first 25 epochs. Momentum and weight decay are respectively set to 0.9 and  $10^{-4}$ . We use a cosine learning rate schedule and a batch size of 96. On ESC50[5], we train for a total of 200 epochs with warm up during first 25 epochs. Other optimization parameters are the same as those in action recognition tasks.

**Comparison with state-of-the-art.** To be comparable with the spatial resolution used by the best performing methods reported in Table 5 of the main submission, we resize the shorter side to 224 pixels, and then randomly crop them into  $200 \times 200$  pixels. Spatial resolution in downstream evaluations are proportionally adjusted. Note that this is exclusive only to our numbers reported in the Table 5 of the main submission.

## 5 Comparison of the Training Cost

According to the Table 10 in the [arxiv](#) version of XDC[1], when using AudioSet [2], XDC models are trained for a total of 2.8M iterations<sup>1</sup>, this increases to 9.3M iterations when using IG-Random/Kinetics datasets for pretraining. In comparison, our models whose performance is reported in the Table 5 of the main submission where trained only for  $\approx 280K$  iterations which is orders of magnitude smaller.

## References

- [1] H. Alwassel, D. Mahajan, B. Korbar, L. Torresani, B. Ghanem, and D. Tran. Self-supervised learning by cross-modal audio-video clustering. In *Advances in Neural Information Processing Systems*, volume 33, pages 9758–9770, 2020.
- [2] J. F. Gemmeke, D. P. Ellis, D. Freedman, A. Jansen, W. Lawrence, R. C. Moore, M. Plakal, and M. Ritter. Audio set: An ontology and human-labeled dataset for audio events. In *2017 IEEE International Conference on Acoustics, Speech and Signal Processing (ICASSP)*, pages 776–780. IEEE, 2017.
- [3] D. P. Kingma and J. Ba. Adam: A method for stochastic optimization. *arXiv preprint arXiv:1412.6980*, 2014.
- [4] H. Kuehne, H. Jhuang, E. Garrote, T. Poggio, and T. Serre. Hmdb: a large video database for human motion recognition. In *2011 International Conference on Computer Vision*, pages 2556–2563. IEEE, 2011.
- [5] K. J. Piczak. Esc: Dataset for environmental sound classification. In *Proceedings of the 23rd ACM international conference on Multimedia*, pages 1015–1018, 2015.
- [6] K. Soomro, A. R. Zamir, and M. Shah. Ucf101: A dataset of 101 human actions classes from videos in the wild. *arXiv preprint arXiv:1212.0402*, 2012.

---

<sup>1</sup> $(es/bs) \times te$
